# Supplementary material for: Targeting selenium nanoparticles combined with baicalin to treat HBV-infected liver cancer
Source: Royal Society of Chemistry journal article supplement (doi:10.1039/c6ra28229f), 2017-01-01
Supplement: c6ra28229f1.pdf [file c6ra28229f1.pdf]

SUPPLEMENTARY INFORMATION

For

**Targeting Selenium Nanoparticles Combined with Baicalin to  
Treat HBV-Infected Liver Cancer**

**Results**

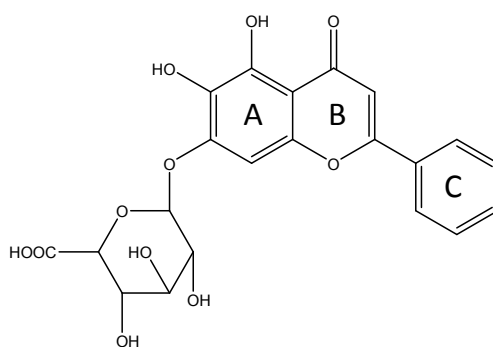

**Figure S1.** Chemical structural formula of baicalin.
